# Supplementary material for: Detection of SARS-CoV-2 in saliva: implications for specimen transport and storage
Source: PubMed Central journal article supplement (PMC8131016; doi:10.1099/jmm.0.001285), 2020-12-03
Supplement: jmm-70-285-s001.pdf [file jmm-70-285-s001.pdf]

**Supplementary Table 1. Xpert Xpress SARS-CoV-2 RT-PCR results for pooled saliva samples combined with various transport media and exposed to various storage conditions over a seven-day period.**

| Storage condition / time point | E gene Ct value |               |              |      | N2 gene Ct value |               |              |      |
|--------------------------------|-----------------|---------------|--------------|------|------------------|---------------|--------------|------|
|                                | Neat saliva     | Normal saline | Liquid Amies | VTM  | Neat saliva      | Normal saline | Liquid Amies | VTM  |
| <b>Room temperature</b>        |                 |               |              |      |                  |               |              |      |
| Time zero                      | 29.5            | 29.1          | 28.1         | 28.3 | 32.1             | 32.7          | 30.9         | 31.6 |
| 24 hours                       | 27.9            | 28.4          | 28.3         | 28.4 | 30.5             | 30.9          | 31.6         | 31.2 |
| 168 hours                      | 28.6            | 28.4          | 28.4         | 28.8 | 31.9             | 30.8          | 31.1         | 31.2 |
| <b>4°C</b>                     |                 |               |              |      |                  |               |              |      |
| Time zero                      | 27.6            | 28.3          | 28.4         | 28.1 | 30.7             | 30.8          | 31.2         | 31.4 |
| 24 hours                       | 28.3            | 29.0          | 28.3         | 28.4 | 31.4             | 32.4          | 31.4         | 31.3 |
| 168 hours                      | 29.5            | 28.4          | 28.6         | 28.7 | 31.9             | 31.6          | 31.5         | 31.5 |

Ct, cycle threshold; VTM, viral transport media.
